# Supplementary material for: Should Fetal Growth Charts Be References or Standards?
Source: PubMed Central journal article supplement — Epidemiology. 2020 Oct 12;32(1):14–7. doi: 10.1097/EDE.0000000000001275 (PMC7707154; doi:10.1097/ede.0000000000001275), 2020-10-12
Supplement: ede-32-014-s001.pdf [file ede-32-014-s001.pdf]

**SUPPLEMENTARY MATERIAL**

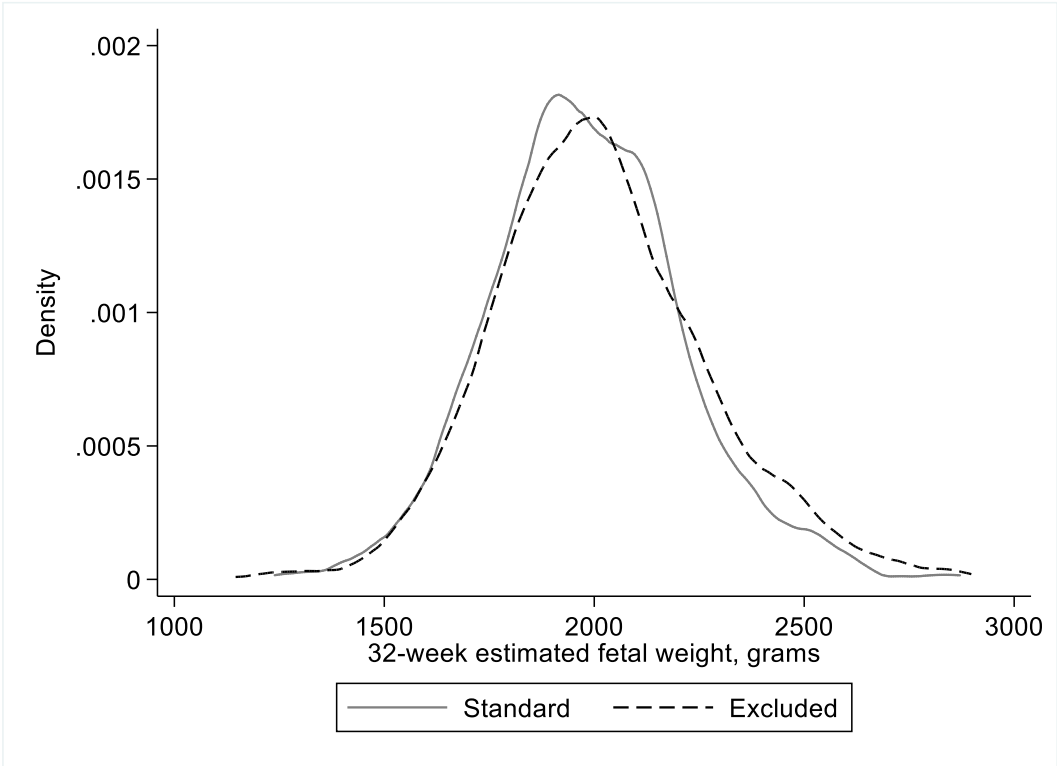

**eFigure 1.** Estimated fetal weight distributions at 32 weeks of fetuses with and without exclusion criteria for a fetal weight standard, Royal Victoria Hospital, Montreal, Canada.
